# Supplementary material for: Outcomes After Sentinel Lymph Node Biopsy and Radiotherapy in Older Women With Early-Stage, Estrogen Receptor–Positive Breast Cancer
Source: PubMed Central journal article supplement (PMC8050744; doi:10.1001/jamanetworkopen.2021.6322), 2021-04-15
Supplement: jamanetwopen-e216322-s001.pdf [file jamanetwopen-e216322-s001.pdf]

## Supplementary Online Content

Carleton N, Zou J, Fang Y, et al. Outcomes after sentinel lymph node biopsy and radiotherapy in older women with early-stage, estrogen receptor–positive breast cancer. *JAMA Netw Open*. 2021;4(4):e216322. doi:10.1001/jamanetworkopen.2021.6322

**eTable 1.** ICD-9 and ICD-10 Codes Used to Define Comorbidities

**eTable 2.** Calculation of Modified Charlson Comorbidity Index

**eTable 3.** Baseline Characteristics of Patients

**eFigure 1.** Flowchart for the Derivation of the Propensity Score Matched Cohorts

**eFigure 2.** Re-analysis of Cohort B Excluding Those Patients That Underwent Mastectomy

This supplementary material has been provided by the authors to give readers additional information about their work.

**eTable 1. ICD-9 and ICD-10 Codes Used to Define Comorbidities**

| Comorbidity              | ICD-9 Codes                                                                                                                                                                                                                   | ICD-10 Codes                                                                                                                                                                                                                                                                                                                                                                                                                                                                                                                                                                                                                                                                                                                                                                                                                                                                                                                                                                                                                                                                                                                                                                                                          |
|--------------------------|-------------------------------------------------------------------------------------------------------------------------------------------------------------------------------------------------------------------------------|-----------------------------------------------------------------------------------------------------------------------------------------------------------------------------------------------------------------------------------------------------------------------------------------------------------------------------------------------------------------------------------------------------------------------------------------------------------------------------------------------------------------------------------------------------------------------------------------------------------------------------------------------------------------------------------------------------------------------------------------------------------------------------------------------------------------------------------------------------------------------------------------------------------------------------------------------------------------------------------------------------------------------------------------------------------------------------------------------------------------------------------------------------------------------------------------------------------------------|
| Congestive heart failure | 398.91, 402.01, 402.11, 402.91, 404.01, 404.03, 404.11, 404.13, 404.91, 404.93, 415.0, 416.0-1, 416.8-417.1, 417.8-9, 425.0, 425.11, 425.18, 425.2-9, 428.0-23, 428.30-33, 428.40-43, 428.9-429.1                             | A18.84, I09.81, I11.0, I13.0, I13.2, I26.01-02, I26.09-127.2, I27.81, I27.89-9, I28.0-1, I28.8-9, I42-3, I50.1, I50.20-23, I50.30-33, I50.40-43, I50.9, I51.4-5                                                                                                                                                                                                                                                                                                                                                                                                                                                                                                                                                                                                                                                                                                                                                                                                                                                                                                                                                                                                                                                       |
| Vascular disease         | 410.01-02, 410.11-12, 410.21-22, 410.31-32, 410.41-42, 410.51-52, 410.61-62, 410.71-72, 410.81-82, 410.91-92, 412, 440.21, 440.30-32, 440.8-9, 444.01, 444.09, 444.1, 444.21-22, 444.81, 444.89-90, 445.01-02, 445.81, 445.89 | I21.01-02, I21.09, I21.11, I21.19, I21.21, I21.29, I21.3-4, I22.0-2, I22.8-9, I25.2, I70.211-213, I70.218-219, I70.301-303, I70.308-309, I70.311-313, I70.318-319, I70.321-323, I70.328-329, I70.331-335, I70.338-339, I70.341-345, I70.348-349, I70.35, I70.361-363, I70.368-369, I70.391-393, I70.398-399, I70.401-403, I70.408-409, I70.411-413, I70.418-419, I70.421-213, I70.428-429, I70.431-435, I70.438-439, I70.441-445, I70.448-45, I70.461-463, I70.468-469, I70.491-493, I70.498-499, I70.501-503, I70.508-509, I70.511-513, I70.518-519, I70.521-523, I70.528-529, I70.531-535, I70.538-539, I70.541-545, I70.548-549, I70.55, I70.561-563, I70.568-569, I70.591-593, I70.598-599, I70.601-603, I70.608-609, I70.611-613, I70.618-619, I70.621-623, I70.628-629, I70.631-635, I70.638-639, I70.641-645, I70.648-649, I70.65, I70.661-663, I70.668-669, I70.691-693, I70.698-699, I70.701-703, I70.708-709, I70.711-713, I70.718-719, I70.721-723, I70.728-729, I70.731-735, I70.738-739, I70.741-745, I70.748-749, I70.75, I70.761-763, I70.768-769, I70.791-793, I70.798-799, I70.8, I70.90-91, I74.01, I74.09-11, I74.19, I74.2-5, I74.8-9, I75.011-013, I75.019, I75.021-023, I75.029, I75.81, I75.89 |

|                      |                                                                                                                                                                                                                                                           |                                                                                                                                                                                                                                                                                                                                                                                                                                                                                                                                                                                                                                                                                                                                                                                                                                                                                                                                                                                                                                                                                                                                                                                                                                                                                                                                                                                                                                                                                   |
|----------------------|-----------------------------------------------------------------------------------------------------------------------------------------------------------------------------------------------------------------------------------------------------------|-----------------------------------------------------------------------------------------------------------------------------------------------------------------------------------------------------------------------------------------------------------------------------------------------------------------------------------------------------------------------------------------------------------------------------------------------------------------------------------------------------------------------------------------------------------------------------------------------------------------------------------------------------------------------------------------------------------------------------------------------------------------------------------------------------------------------------------------------------------------------------------------------------------------------------------------------------------------------------------------------------------------------------------------------------------------------------------------------------------------------------------------------------------------------------------------------------------------------------------------------------------------------------------------------------------------------------------------------------------------------------------------------------------------------------------------------------------------------------------|
| Arterial injury      | 414.19, V12.50, 459.89, 414.10, 442.9, V12.59                                                                                                                                                                                                             | I72.9, Z86.79, I25.3, I99.8                                                                                                                                                                                                                                                                                                                                                                                                                                                                                                                                                                                                                                                                                                                                                                                                                                                                                                                                                                                                                                                                                                                                                                                                                                                                                                                                                                                                                                                       |
| Deep vein thrombosis | 415.11, 453.40, 453.42, 453.50, 453.52, 453.89, 997.2, 997.79, 998.83, 998.89, V12.51                                                                                                                                                                     | I82.509, I82.5Z9, I82.409, T81.72XA, I82.401, I82.4Z9, I82.403, I82.90, T81.89XA, Z86.718                                                                                                                                                                                                                                                                                                                                                                                                                                                                                                                                                                                                                                                                                                                                                                                                                                                                                                                                                                                                                                                                                                                                                                                                                                                                                                                                                                                         |
| Pulmonary embolism   | 997.2, 997.79, 415.11, 415.19, 416.2, V12.55                                                                                                                                                                                                              | I26.99, I27.82, T81.718A, Z86.711                                                                                                                                                                                                                                                                                                                                                                                                                                                                                                                                                                                                                                                                                                                                                                                                                                                                                                                                                                                                                                                                                                                                                                                                                                                                                                                                                                                                                                                 |
| Stroke               | 362.34, 430-432.1, 432.9, 433.00-01, 433.10-11, 433.20-21, 433.30-31, 433.80-81, 433.90-91, 434.00-01, 434.10-11, 434.90-91, 435.0-3, 435.8-9, 438.0, 438.6-7, 438.9-10, 438.12-14, 438.19-22, 438.30-32, 438.40-42, 438.50-53, 438.81-85, 438.89, V12.54 | H34.00-03, G45.0-3, G45.8-G46.2, I60.00-02, I60.10-12, I60.20-22, I60.30-32, I60.4-52, I60.6-I61.6, I61.8-I62.03, I62.1, I62.9-I63.00, I63.011-012, I63.019-020, I63.031-032, I63.039, I63.09-112, I63.119-12, I63.131-132, I63.139, I63.19-20, I63.211-212, I63.219, I63.22, I63.231-232, I63.239, I63.29, I63.30, I63.311-312, I63.319, I63.321-322, I63.329, I63.331-332, I63.339, I63.341-342, I63.349, I63.39-40, I63.411-412, I63.419, I63.421-422, I63.429, I63.431-432, I63.439, I63.441-442, I63.449, I63.49-50, I63.511-512, I63.521-522, I63.529, I63.531-532, I63.539, I63.541-542, I63.549, I63.59-6, I63.8-9, I65.01-03, I65.09, I65.21-23, I65.29, I65.8-9, I66.01-03, I66.09, I66.11-13, I66.19, I66.21-23, I66.29-3, I66.8-9, I67.841, I67.848, I69.00-023, I69.028, I69.031-034, I69.039, I69.041-044, I69.049, I69.051-054, I69.059, I69.061-065, I69.069, I69.090-093, I69.098, I69.10-11, I69.120-123, I69.131-134, I69.139, I69.141-144, I69.149, I69.151-154, I69.159, I69.161-165, I69.169, I69.190-193, I69.198, I69.20-223, I69.228, I69.231-234, I69.239, I69.241-244, I69.249, I69.251-252, I69.254, I69.259, I69.261-265, I69.269, I69.290-293, I69.298, I69.30-323, I69.328, I69.331-334, I69.339, I69.341-344, I69.349, I69.351-354, I69.359, I69.361-65, I69.369, I69.390-393, I69.398, I69.80-81, I69.821-823, I69.828, I69.831-834, I69.839, I69.841-844, I69.849, I69.851-854, I69.859, I69.861-865, I69.869, I69.891-893, I69.898, I69.90-91, |

|                                       |                                                                                  |                                                                                                                                                                                                                                                                                                                                                                                                                                                                                                                                                                                                                                                                                                                                                                                                                                                                                                                                                                                                         |
|---------------------------------------|----------------------------------------------------------------------------------|---------------------------------------------------------------------------------------------------------------------------------------------------------------------------------------------------------------------------------------------------------------------------------------------------------------------------------------------------------------------------------------------------------------------------------------------------------------------------------------------------------------------------------------------------------------------------------------------------------------------------------------------------------------------------------------------------------------------------------------------------------------------------------------------------------------------------------------------------------------------------------------------------------------------------------------------------------------------------------------------------------|
|                                       |                                                                                  | I69.920-923, I69.928, I69.931-934, I69.939, I69.941-944, I69.949, I69.951-954, I69.959, I69.961-965, I69.969, I69.990-993, I69.998, Z86.73                                                                                                                                                                                                                                                                                                                                                                                                                                                                                                                                                                                                                                                                                                                                                                                                                                                              |
| Chronic obstructive pulmonary disease | 427.31-32, 491.1, 491.20-491.22, 491.8-492.0, 492.8, 493.00-493.22, 494.0-1, 496 | I480-I48.4, I48.91-2, J41.1, J41.8, J42, J43.0-3, J44.0-1, J44.9, J45.20-22, J45.20-22, J45.30-32, J45.40-42, J45.50-52, J47.0-1, J47.9                                                                                                                                                                                                                                                                                                                                                                                                                                                                                                                                                                                                                                                                                                                                                                                                                                                                 |
| Fibromyalgia                          | 729.1                                                                            | M79.7                                                                                                                                                                                                                                                                                                                                                                                                                                                                                                                                                                                                                                                                                                                                                                                                                                                                                                                                                                                                   |
| Psoriatic arthritis                   | 696.3, 696.4, 696.5, 696.0, 696.1, 696.2, 696.8                                  | L42, L30.5, L40.59, L40.0, L40.8, L94.5, L40.51, L40.53, L40.3, L40.4, L41.1, L41.5, L40.1, L40.50, L40.2, L41.3, L44.0, L40.52, L40.9, L41.0, L41.8, L44.8, L45, L41.4, L41.9, L40.54                                                                                                                                                                                                                                                                                                                                                                                                                                                                                                                                                                                                                                                                                                                                                                                                                  |
| Rheumatoid arthritis                  | 714.0, 714.1, 714.81, 357.1, 359.6, 714.2, 714.89, 714.9                         | M05.542, M05.549, M05.572, M05.579, M05.412, M05.429, M05.459, M05.462, M05.711, M05.712, M05.721, M05.751, M05.769, M05.819, M05.842, M05.851, M05.862, M05.872, M06.071, M06.211, M06.239, M06.242, M06.252, M06.30, M06.332, M06.342, M06.351, M06.811, M05.00, M05.021, M05.039, M05.051, M05.20, M05.229, M05.251, M05.261, M05.262, M05.279, M05.30, M05.332, M05.60, M05.661, M05.671, M05.10, M05.142, M05.522, M05.552, M05.571, M05.441, M05.461, M05.472, M05.479, M05.731, M05.752, M05.779, M05.821, M06.00, M06.019, M06.021, M06.031, M06.059, M06.212, M06.219, M06.241, M06.261, M06.269, M06.271, M06.29, M06.312, M06.319, M06.349, M06.379, M06.842, M06.849, M06.9, M05.062, M05.079, M05.222, M05.249, M05.342, M05.351, M05.622, M05.632, M05.649, M05.679, M05.119, M05.169, M05.50, M05.532, M05.562, M05.59, M05.411, M05.431, M05.442, M05.49, M05.762, M05.829, M05.832, M05.859, M06.032, M06.039, M06.052, M06.062, M06.221, M06.231, M06.341, M06.361, M06.812, M06.821, |

|  |                                                                                                                                                                                                                                                                                                                                                                                                                                                                                                                                                                                                                                                                                                                                                                                                                                                                                                                                                                                                                                                                                                                                                                                                                                                                                                                                                                                                                                                                                                                                                                                                                                                                                                         |
|--|---------------------------------------------------------------------------------------------------------------------------------------------------------------------------------------------------------------------------------------------------------------------------------------------------------------------------------------------------------------------------------------------------------------------------------------------------------------------------------------------------------------------------------------------------------------------------------------------------------------------------------------------------------------------------------------------------------------------------------------------------------------------------------------------------------------------------------------------------------------------------------------------------------------------------------------------------------------------------------------------------------------------------------------------------------------------------------------------------------------------------------------------------------------------------------------------------------------------------------------------------------------------------------------------------------------------------------------------------------------------------------------------------------------------------------------------------------------------------------------------------------------------------------------------------------------------------------------------------------------------------------------------------------------------------------------------------------|
|  | M06.822, M06.872, M05.049,<br>M05.052, M05.059, M05.071,<br>M05.09, M05.211,<br>M05.252, M05.349, M05.359,<br>M05.369, M05.372, M05.611,<br>M05.631, M05.651, M05.652,<br>M05.122, M05.161, M05.19,<br>M05.569, M05.419, M05.421,<br>M05.729, M05.741, M05.761,<br>M05.772, M05.811, M05.839,<br>M05.852, M05.871, M06.049,<br>M06.08, M06.249, M06.272,<br>M06.369, M06.371, M06.829,<br>M06.859, M06.871, M06.879,<br>M05.012, M05.022, M05.221,<br>M05.239, M05.242, M05.269,<br>M05.272, M05.321, M05.621,<br>M05.639, M05.519, M05.521,<br>M05.529, M05.539, M05.739,<br>M05.841, M05.89, M05.9,<br>M06.011, M06.041, M06.042,<br>M06.069,<br>M06.09, M06.222, M06.229,<br>M06.279, M06.311, M06.339,<br>M06.38, M06.39, M06.831,<br>M05.259,<br>M05.311, M05.312, M05.319,<br>M05.331, M05.361, M05.362,<br>M05.629, M05.642, M05.659,<br>M05.662, M05.121, M05.132,<br>M05.139, M05.162, M05.171,<br>M05.172, M06.4, M05.511,<br>M05.531, M05.559, M05.432,<br>M05.439, M05.451, M05.452,<br>M05.719, M05.742, M05.749,<br>M05.759, M05.79, M06.012,<br>M06.022, M06.20, M06.251,<br>M06.259, M06.321, M06.322,<br>M06.329, M06.359, M06.362,<br>M06.80, M06.852, M05.029,<br>M05.041, M05.061, M05.212,<br>M05.231, M05.241, M05.29,<br>M05.322, M05.329, M05.112,<br>M05.152, M05.541, M05.551,<br>M05.561, M05.449, M05.471,<br>M05.70, M05.771, M05.80,<br>M05.849, M06.051, M06.061,<br>M06.072, M06.079, M06.232,<br>M06.28, M06.331, M06.819,<br>M06.832, M06.841, M06.851,<br>M06.861, M06.89, M05.019,<br>M05.032, M05.042, M05.072,<br>M05.219, M05.232, M05.271,<br>M05.352, M05.379, M05.39,<br>M05.619, M05.669, M05.672,<br>M06.1, M05.111, M05.131,<br>M05.141, M05.159, M05.512, |
|--|---------------------------------------------------------------------------------------------------------------------------------------------------------------------------------------------------------------------------------------------------------------------------------------------------------------------------------------------------------------------------------------------------------------------------------------------------------------------------------------------------------------------------------------------------------------------------------------------------------------------------------------------------------------------------------------------------------------------------------------------------------------------------------------------------------------------------------------------------------------------------------------------------------------------------------------------------------------------------------------------------------------------------------------------------------------------------------------------------------------------------------------------------------------------------------------------------------------------------------------------------------------------------------------------------------------------------------------------------------------------------------------------------------------------------------------------------------------------------------------------------------------------------------------------------------------------------------------------------------------------------------------------------------------------------------------------------------|

|                                                                                                                     |                                                                                                                                                                                                                                                                          |                                                                                                                                                                                                                                                                                                                                                                                                                                                                                                                                                                                                                                                                                                                                                                                                                                                                           |
|---------------------------------------------------------------------------------------------------------------------|--------------------------------------------------------------------------------------------------------------------------------------------------------------------------------------------------------------------------------------------------------------------------|---------------------------------------------------------------------------------------------------------------------------------------------------------------------------------------------------------------------------------------------------------------------------------------------------------------------------------------------------------------------------------------------------------------------------------------------------------------------------------------------------------------------------------------------------------------------------------------------------------------------------------------------------------------------------------------------------------------------------------------------------------------------------------------------------------------------------------------------------------------------------|
|                                                                                                                     |                                                                                                                                                                                                                                                                          | M05.40, M05.422, M05.469, M05.722, M05.732, M05.812, M05.822, M05.831, M05.861, M05.869, M05.879, M06.029, M06.262, M06.352, M06.372, M06.839, M06.862, M06.869, M06.88, M05.011, M05.031, M05.069, M05.339, M05.341, M05.371, M05.612, M05.641, M05.69, M05.129, M05.149, M05.151, M05.179                                                                                                                                                                                                                                                                                                                                                                                                                                                                                                                                                                               |
| Systemic lupus erythematosus                                                                                        | 517.8, 289.81, 583.81, 424.91, 286.53, 420.0, 695.4, 710.0                                                                                                                                                                                                               | M32.14, M32.9, D68.61, L93.1, M32.13, M32.15, M32.12, M32.11, L93.2, D68.62, L93.0, D68.312, M32.0, M32.10, M32.8, M32.19                                                                                                                                                                                                                                                                                                                                                                                                                                                                                                                                                                                                                                                                                                                                                 |
| Diabetes (includes both type 1 diabetes mellitus and type 2 diabetes mellitus; does not include diabetes insipidus) | T1DM: 250.01, 250.03, 250.41, 250.43, 250.51, 250.53, 250.61, 250.63, 250.71, 250.73, 250.81, 250.83<br>T2DM: 250.00, 250.02, 250.10-13, 250.20-23, 250.30-33, 250.40, 250.42, 250.50, 250.52, 250.60, 250.62, 250.70, 250.72, 250.80, 250.82, 250.90-93, V45.85, Z96.41 | T1DM: E10.9, E10.21-22, E10.29, E10.36, E10.39-44, E10.49, E10.51-52, E10.59, E10.65, E10.69, E10.311, E10.319, E10.321, E10.329, E10.331, E10.339, E10.341, E10.349, E10.351, E10.359, E10.610, E10.618, E10.620-22, E10.628, E10.630, E10.638, E10.649<br>T2DM: E10.10-11, E10.641, E10.65, E10.69, E10.8, E11.00-01, E11.21-22, E11.29, E11.311, E11.319, E11.321, E11.329, E11.331, E11.339, E11.341, E11.349, E11.351, E11.359, E11.36, E11.39-44, E11.49, E11.51-52, E11.59, E11.610, E11.618, E11.620-22, E11.628, E11.630, E11.638, E11.641, E11.649, E11.65, E11.69, E11.8-9, E13.00-01, E13.10-11, E13.21-22 E13.29, E13.311, E13.319, E13.321, E13.329, E13.331, E13.339, E13.341, E13.349, E13.351, E13.359, E13.36, E13.39-44, E13.49, E13.51-52, E13.59, E13.610, E13.618, E13.620-22, E13.628, E13.630, E13.638, E13.641, E13.649, E13.65, E13.69, E13.8-9 |
| Chronic kidney disease                                                                                              | 585.3, 585.4, 585.5                                                                                                                                                                                                                                                      | N18.3, N18.4, N18.5                                                                                                                                                                                                                                                                                                                                                                                                                                                                                                                                                                                                                                                                                                                                                                                                                                                       |

**eTable 2.** Calculation of Modified Charlson Comorbidity Index

The widely used Charlson comorbidity index (CCI) was adapted to calculate a modified Charlson comorbidity index (mCCI) to capture the extent to which the patients in this study had pre-existing conditions at the time of breast cancer diagnosis. Of note, in the original CCI, any solid tumor would give a patient a score of 2; because all patients in this study had a solid tumor (breast cancer), each patient's baseline score would be 2. The final mCCI score is a sum of the scores for each comorbid condition a patient had.

| Charlson Comorbidity Index (CCI)      | Modified Charlson Comorbidity Index (mCCI)                                                                 | Score |
|---------------------------------------|------------------------------------------------------------------------------------------------------------|-------|
| Myocardial Infarction                 | Not captured.                                                                                              | 1     |
| Congestive Heart Failure              | Included as is.                                                                                            | 1     |
| Peripheral Vascular Disease           | Included using the following listings: vascular disease, arterial injury, DVT, or PE.                      | 1     |
| Cerebrovascular Disease               | Included using the following listings: stroke.                                                             | 1     |
| Dementia                              | Not captured.                                                                                              | 1     |
| Chronic Obstructive Pulmonary Disease | Included as is.                                                                                            | 1     |
| Connective Tissue Disease             | Included using the following listings: fibromyalgia, psoriatic arthritis, rheumatoid arthritis, and lupus. | 1     |
| Peptic Ulcer Disease                  | Not captured.                                                                                              | 1     |
| Mild Liver Disease                    | Not captured.                                                                                              | 1     |
| Diabetes                              | Included as is.                                                                                            | 1     |
| Any solid tumor                       | All patients had a solid tumor; thus all patients had a baseline score of 2.                               | 2     |
| Diabetes with Chronic Complications   | Not captured.                                                                                              | 2     |
| Hemiplegia or Paraplegia              | Not captured.                                                                                              | 2     |
| Renal Disease                         | Included using the following listings: chronic kidney disease.                                             | 2     |
| Leukemia or lymphoma                  | Not captured.                                                                                              | 2     |
| Moderate or Severe Liver Disease      | Not captured.                                                                                              | 3     |
| AIDS                                  | Not captured.                                                                                              | 6     |
| Metastatic solid tumor                | Not captured.                                                                                              | 6     |

**eTable 3.** Baseline Characteristics of Patients

| Patient characteristic                 | Total (N = 2,109) | No SLNB (n = 736) | SLNB (n = 1,373) | P value  | No RT <sup>a</sup> (n = 848) | RT <sup>a</sup> (n = 1,219) | P value  |
|----------------------------------------|-------------------|-------------------|------------------|----------|------------------------------|-----------------------------|----------|
| Median age at diagnosis, years (Q1-Q3) | 77.0 (73.0-82.0)  | 80.0 (74.0-86.0)  | 75.0 (72.0-79.0) | < 0.0001 | 80.0 (74.0-85.0)             | 75.0 (72.0-79.0)            | < 0.0001 |
| Median follow up time, years (Q1-Q3)   | 4.1 (2.5-5.7)     | 3.4 (1.7-5.1)     | 4.3 (3.1-6.0)    | < 0.0001 | 3.4 (1.8-5.0)                | 4.5 (3.1-6.0)               | < 0.0001 |
| Insurance status                       |                   |                   |                  |          |                              |                             |          |
| Commercial / Private                   | 451 (21.3)        | 130 (17.7)        | 321 (23.4)       | 0.0091   | 143 (16.9)                   | 299 (24.5)                  | 0.0004   |
| Medicaid                               | 33 (1.6)          | 13 (1.8)          | 20 (1.5)         |          | 16 (1.9)                     | 14 (1.1)                    |          |
| Medicare                               | 1,526 (72.4)      | 561 (76.2)        | 965 (70.3)       |          | 645 (76.1)                   | 854 (70.1)                  |          |
| Not Insured                            | 3 (0.1)           | 0 (0.0)           | 3 (0.2)          |          | 1 (0.1)                      | 2 (0.2)                     |          |
| Other / Unknown                        | 96 (4.6)          | 32 (4.3)          | 64 (4.7)         |          | 43 (5.1)                     | 50 (4.1)                    |          |
| Median tumor size (mm) (Q1-Q3)         | 15.0 (9.0-22.0)   | 15.0 (9.8-27.0)   | 14.0 (9.0-20.0)  | < 0.0001 | 15.0 (9.5-25.0)              | 14.0 (9.0-20.0)             | < 0.0001 |
| Clinical T Stage                       |                   |                   |                  |          |                              |                             |          |
| In Situ / T0                           | 43 (2.0)          | 28 (3.8)          | 15 (1.1)         | < 0.0001 | 17 (2.0)                     | 24 (2.0)                    | 0.0002   |
| T1                                     | 1,411 (66.9)      | 369 (50.1)        | 1042 (75.9)      |          | 470 (55.4)                   | 915 (75.1)                  |          |
| T2 or Above                            | 474 (22.5)        | 168 (22.8)        | 306 (22.3)       |          | 208 (24.5)                   | 258 (21.2)                  |          |
| Unknown                                | 181 (8.6)         | 171 (23.2)        | 10 (0.7)         |          | 153 (18.0)                   | 22 (1.8)                    |          |
| Grade                                  |                   |                   |                  |          |                              |                             |          |
| I                                      | 503 (23.9)        | 155 (21.1)        | 348 (25.3)       | 0.31     | 190 (22.4)                   | 306 (25.1)                  | 0.13     |
| II                                     | 1,186 (56.2)      | 410 (55.7)        | 776 (56.5)       |          | 466 (55.0)                   | 693 (56.8)                  |          |
| III                                    | 288 (13.7)        | 99 (13.5)         | 189 (13.8)       |          | 129 (15.2)                   | 154 (12.6)                  |          |
| NA / Unknown                           | 132 (6.3)         | 72 (9.8)          | 60 (4.4)         |          | 63 (7.4)                     | 66 (5.4)                    |          |
| Pathologic node positivity after SLNB  | --                | --                | 159 (11.5)       | --       | 39 (24.5) <sup>b</sup>       | 116 (73.0) <sup>b</sup>     | --       |
| Tumor histology                        |                   |                   |                  |          |                              |                             |          |
| DCIS / IDC                             | 1,447 (68.6)      | 488 (66.3)        | 959 (69.8)       | 0.55     | 591 (69.7)                   | 849 (69.6)                  | 0.93     |
| LCIS / ILC                             | 278 (13.2)        | 96 (13.0)         | 182 (13.3)       |          | 117 (13.8)                   | 157 (12.9)                  |          |
| Mixed IDC / ILC                        | 68 (3.2)          | 21 (2.9)          | 47 (3.4)         |          | 29 (3.4)                     | 37 (3.0)                    |          |
| Mucinous adenocarcinoma                | 62 (2.9)          | 26 (3.5)          | 36 (2.6)         |          | 26 (3.1)                     | 38 (3.1)                    |          |
| Other / Unknown                        | 254 (12.0)        | 105 (14.3)        | 149 (10.9)       |          | 85 (10.0)                    | 138 (11.3)                  |          |
| Surgical Intervention                  |                   |                   |                  |          |                              |                             |          |
| SLNB                                   | 1,373 (65.1)      | --                | --               | --       | 391 (46.1)                   | 959 (78.7)                  | < 0.0001 |
| Lumpectomy                             | 1,367 (64.8)      | 356 (48.4)        | 1011 (73.6)      | < 0.0001 | 304 (35.8)                   | 1039 (85.2)                 | < 0.0001 |
| Mastectomy                             | 583 (27.6)        | 223 (30.3)        | 360 (26.2)       | 0.046    | 405 (47.8)                   | 165 (13.5)                  | < 0.0001 |
| No Lumpectomy or Mastectomy            | 156 (7.4)         | 154 (20.9)        | 2 (0.1)          | < 0.0001 | 137 (16.2)                   | 14 (1.1)                    | < 0.0001 |
| Therapy                                |                   |                   |                  |          |                              |                             |          |
| Hormone therapy                        | 1,786 (84.7)      | 578 (78.5)        | 1208 (88.0)      | < 0.0001 | 651 (76.8)                   | 1110 (91.1)                 | < 0.0001 |



|                                                  |                          |              |            |              |          |            |              |          |
|--------------------------------------------------|--------------------------|--------------|------------|--------------|----------|------------|--------------|----------|
|                                                  | Radiation therapy        | 1,219 (57.8) | 260 (35.3) | 959 (69.8)   | < 0.0001 | --         | --           | --       |
|                                                  | Chemotherapy             | 108 (5.1)    | 35 (4.8)   | 73 (5.3)     | 0.61     | 30 (3.5)   | 76 (6.2)     | 0.006    |
| Modified Charlson comorbidity index (mCCI) Score |                          |              |            |              |          |            |              |          |
|                                                  | 2                        | 875 (41.5)   | 251 (34.1) | 624 (45.4)   | < 0.0001 | 320 (37.7) | 544 (44.6)   | 0.03     |
|                                                  | 3                        | 313 (14.8)   | 102 (13.9) | 211 (15.4)   |          | 129 (15.2) | 180 (14.8)   |          |
|                                                  | 4                        | 79 (3.7)     | 39 (5.3)   | 40 (2.9)     |          | 31 (3.7)   | 44 (3.6)     |          |
|                                                  | ≥ 5                      | 72 (3.4)     | 37 (5.0)   | 35 (2.5)     |          | 38 (4.5)   | 33 (2.7)     |          |
|                                                  | NA                       | 770 (36.5)   | 307 (41.7) | 463 (33.7)   |          | 330 (38.9) | 418 (34.3)   |          |
| mCCI Score, mean (SD)                            |                          | 2.5 (0.9)    | 2.7 (1.1)  | 2.5 (0.8)    | < 0.0001 | 2.6 (1.0)  | 2.5 (0.8)    | 0.0112   |
| Comorbidity <sup>c</sup>                         |                          |              |            |              |          |            |              |          |
|                                                  | Congestive heart failure | 72 (5.3)     | 43 (10.0)  | 29 (3.2)     | < 0.0001 | 45 (5.3)   | 27 (2.2)     | 0.0002   |
|                                                  | Diabetes                 | 230 (17.2)   | 84 (19.6)  | 146 (16.0)   | 0.61     | 91 (10.7)  | 136 (11.2)   | 0.78     |
|                                                  | Coronary artery disease  | 138 (10.3)   | 63 (14.7)  | 75 (8.2)     | 0.007    | 61 (7.2)   | 75 (6.2)     | 0.37     |
|                                                  | Stroke                   | 91 (6.8)     | 45 (10.5)  | 46 (5.1)     | 0.005    | 46 (5.4)   | 43 (3.5)     | 0.047    |
|                                                  | COPD                     | 99 (7.4)     | 37 (8.6)   | 62 (6.8)     | 0.59     | 46 (5.4)   | 52 (4.3)     | 0.25     |
|                                                  | Chronic kidney disease   | 48 (3.6)     | 22 (5.1)   | 26 (2.9)     | 0.13     | 20 (2.4)   | 26 (2.1)     | 0.76     |
| Recurrence                                       |                          |              |            |              |          |            |              |          |
|                                                  | No Recurrence            | 2,028 (96.2) | 703 (95.5) | 1,325 (96.5) | 0.28     | 801 (94.5) | 1,186 (97.3) | 0.002    |
|                                                  | Locoregional             | 28 (1.3)     | 8 (1.1)    | 20 (1.5)     | 0.55     | 22 (2.6)   | 6 (0.5)      | < 0.0001 |
|                                                  | Distant                  | 53 (2.5)     | 25 (3.4)   | 28 (2.0)     | 0.08     | 25 (2.9)   | 27 (2.2)     | 0.32     |
| Surgical Site SLNB <sup>d</sup>                  |                          |              |            |              |          |            |              |          |
|                                                  | Academic                 | 571 (27.1)   | 131 (17.8) | 440 (32.0)   | < 0.0001 | --         | --           |          |
|                                                  | Non-Academic             | 1,538 (72.9) | 605 (82.2) | 933 (68.0)   |          | --         | --           |          |

Data are displayed as number (percentage) unless otherwise specified.

*a* There were n = 42 patients with unknown radiation therapy status.

*b* Calculated as a percentage of the total node positive cases (e.g., 39 patients out of 159 patients that were node positive after SLNB did not go on to have RT).

*c* Calculated as a percentage of those with comorbidity data (n = 1,339).

*d* Data from SLNB use in non-academic centers is aggregated from 14 different community hospitals, while data for the academic surgical site is two academic hospitals.

Statistical tests used: Mann-Whitney test, Chi-square test, Fisher's exact test.

**eFigure 1.** Flowchart for the Derivation of the Propensity Score Matched Cohorts

Flowchart for how the propensity score matched cohorts were derived. Cohort A, which was matched over the variables seen in the figure, was used to evaluate the results of SLNB. Cohort B, which was matched over the same variables as Cohort A with the addition of receipt of SLNB and the pathologic node status, was used to evaluate the results of RT.

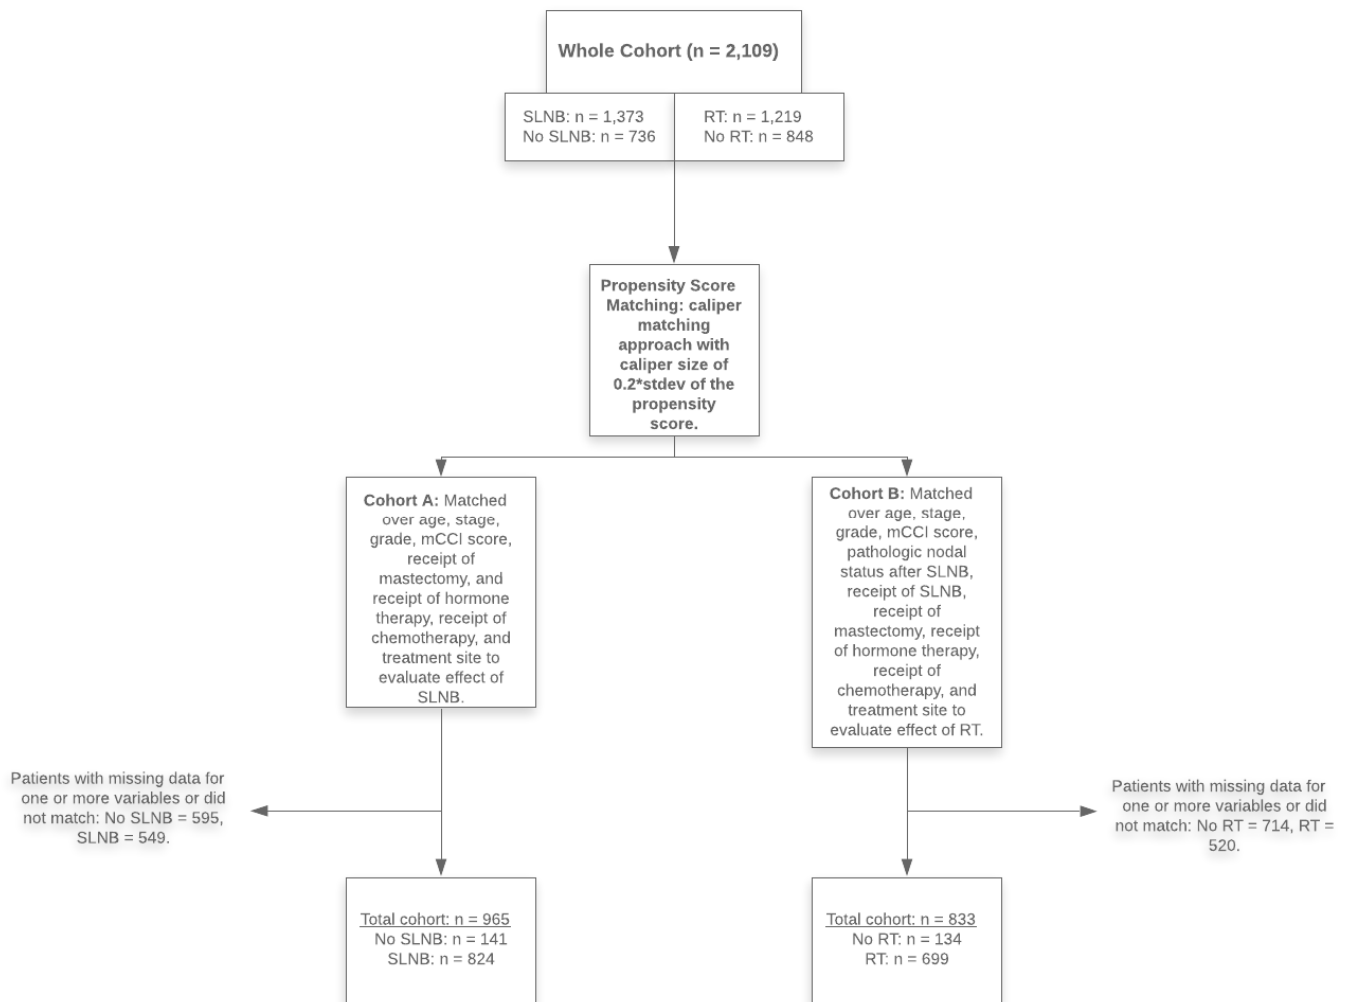

**eFigure 2.** Re-analysis of Cohort B Excluding Those Patients That Underwent Mastectomy

Using propensity score matched Cohort B, we now exclude patients who underwent mastectomy from the analysis. From the No RT group, n = 45 (36%) were excluded from the propensity matched cohort. However, since the No RT group was matched 1:5 with the RT group, this did not result in a significant loss in patients. From the RT group, n = 78 (11%) patients were excluded from the propensity matched cohort. We found that the data was very similar to that shown in Figure 3 and Table 2: RT does not impact DFS (p = 0.30 on log-rank testing) **(A)** or LRFS (p = 0.25 on log-rank testing) **(B)**; further, in multivariate analysis **(C)**, we found that RT did not significantly impact LRFS (p = 0.26) or DFS (p = 0.67). Further, after omitting mastectomy patients, we again find small absolute rates of recurrence (No RT group: 3.5% vs. RT group: 2.3%), supporting the fact that RT can be omitted about breast conserving surgery.

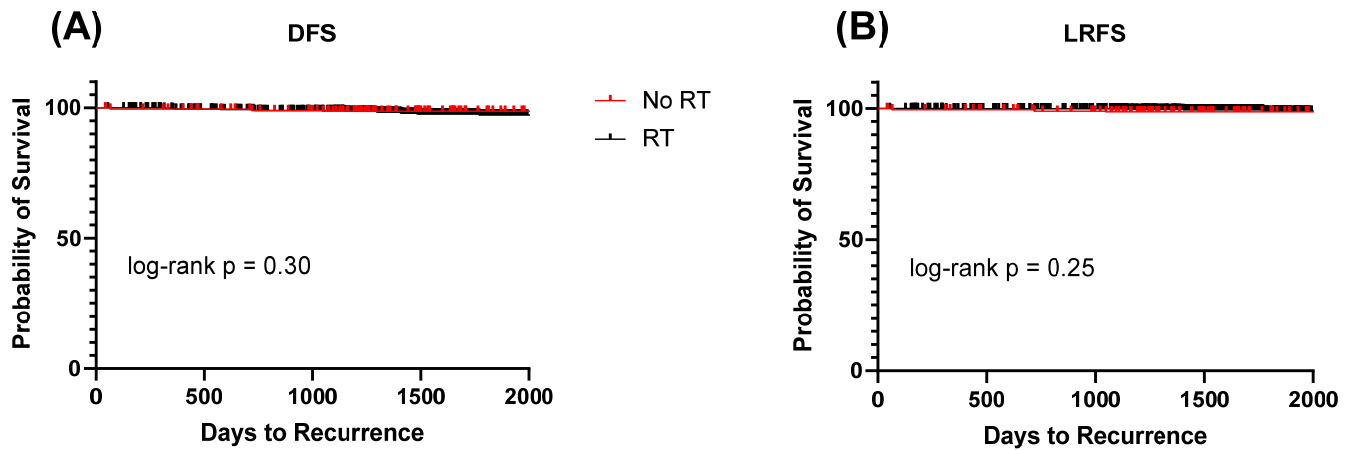

**(C)**

| Variable                  | LRFS               |         | DFS               |          |
|---------------------------|--------------------|---------|-------------------|----------|
|                           | HR (95% CI)        | P-Value | HR (95% CI)       | P-Value  |
| Radiation Therapy         | 0.48 (0.14, 1.68)  | 0.26    | 1.23 (0.48, 3.18) | 0.67     |
| Pathologic Node Status*   | --                 | --      | 1.73 (0.51, 5.93) | 0.38     |
| Age                       | 1.21 (1.08, 1.35)  | 0.001   | 1.16 (1.07, 1.26) | < 0.0001 |
| mCCI Score                | 0.82 (0.31, 2.17)  | 0.69    | 1.11 (0.66, 1.87) | 0.70     |
| Grade 2 & 3 vs. 1 Disease | 0.64 (0.16, 2.62)  | 0.54    | 0.77 (0.25, 2.33) | 0.64     |
| T2 & Above vs. T1 Tumor   | 2.57 (0.64, 10.37) | 0.18    | 3.34 (1.21, 9.25) | 0.02     |
